# Supplementary material
Source: PubMed Central journal article supplement (PMC4854193)
Supplement: NIHMS779769-supplement-Lu_supplemental.pdf [file NIHMS779769-supplement-Lu_supplemental.pdf]

**Supplementary Table 1.** Markers and lines used in this study. Arabidopsis plants stably expressing fluorescent-tagged markers (At line) were used for *Hyaloperonospora arabidopsidis* (*Hpa*) infections; transient expression of the respective markers (construct) in *N. benthamiana* (Nb) was used for *Phytophthora infestans* (*Pi*) infections; plasma membrane (PM), endoplasmic reticulum (ER), trans-Golgi network (TGN), extrahaustorial membrane (EHM).

| Gene/Marker    | Localization          | At line/construct | Reference  | Interaction tested |               |
|----------------|-----------------------|-------------------|------------|--------------------|---------------|
| PIP1;4         | PM                    | WAVE138y          | 1          | <i>At-Hpa</i>      | Nb- <i>Pi</i> |
| ACA8           | PM                    | ACA8-GFP/YFP      | 2          | <i>At-Hpa</i>      | Nb- <i>Pi</i> |
| REM1*          | PM                    | YFP-StREM1        | 3          |                    | Nb- <i>Pi</i> |
| SYT1           | PM/ER                 | SYT1-GFP          | 4          |                    | Nb- <i>Pi</i> |
| EFR            | PM/ER                 | EFR-YFP           | 5          |                    | Nb- <i>Pi</i> |
| PEN1           | PM/Endosome           | GFP-PEN1          | 6          | <i>At-Hpa</i>      | Nb- <i>Pi</i> |
| FLS2           | PM/Endosome           | FLS2-GFP          | 7          | <i>At-Hpa</i>      | Nb- <i>Pi</i> |
| RPW8.2         | Golgi/ER/EHM          | RPW8.2-YFP        | 8          | <i>At-Hpa</i>      |               |
| Rab D2a        | Golgi/ER              | WAVE29y           | 1          |                    | Nb- <i>Pi</i> |
| SYP32          | Golgi                 | WAVE22y           | 1          | <i>At-Hpa</i>      | Nb- <i>Pi</i> |
| Got1p          | Golgi                 | WAVE18y           | 1          | <i>At-Hpa</i>      | Nb- <i>Pi</i> |
| Rab E1d        | Golgi/Post-Golgi      | WAVE27y           | 1          | <i>At-Hpa</i>      | Nb- <i>Pi</i> |
| VAMP722        | Post-Golgi            | GFP-VAMP722       | 9          |                    | Nb- <i>Pi</i> |
| Rab A5d        | TGN/Post-Golgi        | WAVE24y           | 1          | <i>At-Hpa</i>      | Nb- <i>Pi</i> |
| VTI12          | TGN/Early endosome    | WAVE13y           | 1          | <i>At-Hpa</i>      | Nb- <i>Pi</i> |
| VPS28-2        | TGN/Early endosome    | Y/RFP-VPS28-2     | this study | <i>At-Hpa</i>      | Nb- <i>Pi</i> |
| VPS37-1        | TGN/Early endosome    | YFP-VPS37-1       | this study |                    | Nb- <i>Pi</i> |
| Rab A1e        | Endosome              | WAVE34y           | 1          | <i>At-Hpa</i>      |               |
| Rab C1         | Endosome              | WAVE3y            | 1          | <i>At-Hpa</i>      |               |
| Rab F2b (ARA7) | Endosome              | mRFP-ARA7         | 10         | <i>At-Hpa</i>      |               |
| Rab F2a (Rha1) | Endosome              | WAVE7y            | 1          |                    | Nb- <i>Pi</i> |
| Rab F1 (ARA6)  | Late endosome         | ARA6-mRFP         | 10         | <i>At-Hpa</i>      |               |
| FYVE**         | Late endosome         | GFP-2xFYVE        | 11         | <i>At-Hpa</i>      | Nb- <i>Pi</i> |
| Rab G3f        | Vacuole/Late endosome | WAVE5y            | 1          | <i>At-Hpa</i>      |               |
| Rab G3c        | Vacuole/Late endosome | WAVE11y           | 1          |                    | Nb- <i>Pi</i> |
| VAMP711        | Vacuole               | WAVE9y            | 1          | <i>At-Hpa</i>      |               |

Markers without asterisk are originating from Arabidopsis; \* potato; \*\* FYVE domain from the mouse hepatocyte growth factor-regulated tyrosine kinase substrate; <sup>1</sup>Geldner et al., 2009; <sup>2</sup>Frei dit Frey et al., 2011; <sup>3</sup>Lefebvre et al., 2010; <sup>4</sup>Schapiro et al., 2008; <sup>5</sup>Häweker et al., 2010; <sup>6</sup>Meyer et al., 2009; <sup>7</sup>Göhre et al., 2008; <sup>8</sup>Wang et al., 2009; <sup>9</sup>Lipka et al., 2005; <sup>10</sup>provided by K. Schumacher; <sup>11</sup>Vermeer et al., 2006

**Supplementary Table 2.** Summary of marker localization in the absence and presence of *Hyaloperonospora arabidopsidis* (*Hpa*) and *Phytophthora infestans* (*Pi*) infection in *A. thaliana* (*At*) and *N. benthamiana* (*Nb*). Detection of fluorescent signals: clear discrete signal (discrete); weak widespread signal (diffuse); at cell periphery (periphery); at spots (vesicles); not at haustoria (excluded); at haustoria (surrounding); at extrahaustorial membrane (EHM); at haustorial encasements (encased); accumulates at haustoria (+); reduced (-); no difference in localization between uninfected and infected (no difference).

| Marker  | At uninfected                     | At infected                       | <i>Hpa</i> haustoria          | Nb uninfected                    | Nb infected                      | <i>Pi</i> haustoria |
|---------|-----------------------------------|-----------------------------------|-------------------------------|----------------------------------|----------------------------------|---------------------|
| PIP1;4  | Periphery discrete                | Periphery discrete                | Excluded<br>Encased           | Periphery discrete               | Periphery diffuse                | Excluded -          |
| ACA8    | Periphery discrete                | Periphery discrete                | Excluded<br>Encased           | Periphery discrete               | Periphery discrete               | Excluded            |
| REM1    |                                   |                                   |                               | Periphery discrete               | Periphery discrete               | Surrounding         |
| SYT1    |                                   |                                   |                               | Periphery discrete               | Periphery discrete               | Surrounding +       |
| EFR     |                                   |                                   |                               | Periphery discrete               | Periphery discrete               | Excluded            |
| PEN1    | Periphery discrete                | Periphery discrete<br>Vesicles    | Surrounding<br>EHM<br>Encased | Vesicles discrete                |                                  |                     |
| FLS2    | Periphery discrete                | Periphery discrete                | Surrounding<br>EHM            | Periphery discrete               | Periphery discrete               | Excluded            |
| RPW8.2  | Not expressed                     | Vesicles discrete                 | Surrounding +<br>Encased      |                                  |                                  |                     |
| Rab D2a |                                   |                                   |                               | Periphery<br>Vesicles<br>diffuse | Periphery<br>Vesicles<br>diffuse | Surrounding         |
| SYP32   | Vesicles discrete                 | Vesicles discrete                 | Surrounding +<br>Encased      | Vesicles discrete                | Vesicles discrete                | No difference       |
| Got1p   | Vesicles discrete                 | Vesicles discrete                 | Surrounding<br>Encased        | Vesicles discrete                | Vesicles discrete                | No difference       |
| Rab E1d | Periphery<br>Vesicles<br>discrete | Periphery<br>Vesicles<br>discrete | Surrounding<br>Encased        | Vesicles discrete                | Vesicles discrete                | Surrounding +       |
| VAMP722 |                                   |                                   |                               | Vesicles                         | Vesicles                         | Surrounding         |

|                 |                                   |                                     |                        |                                                |                                   |               |
|-----------------|-----------------------------------|-------------------------------------|------------------------|------------------------------------------------|-----------------------------------|---------------|
|                 |                                   |                                     |                        | discrete                                       | discrete                          | (callosic) +  |
| Rab A5d         | Periphery<br>diffuse              | Periphery<br>diffuse                | Surrounding<br>Encased | Vesicles<br>diffuse                            | Vesicles<br>diffuse               | Surrounding + |
| VTI12           | Vesicles<br>diffuse               | Vesicles<br>diffuse                 | Surrounding<br>Encased | Vesicles<br>diffuse                            | Vesicles<br>diffuse               | No difference |
| VPS28-2         | Vesicles<br>distinct              | Vesicles<br>distinct                | Surrounding            | Periphery<br>Vesicles<br>distinct              | Periphery<br>Vesicles<br>distinct | Surrounding   |
| VPS37-1         |                                   |                                     |                        | Periphery<br>Vesicles<br>distinct              | Periphery<br>Vesicles<br>distinct | Surrounding   |
| Rab A1e         | Periphery<br>Vesicles<br>diffuse  | Periphery<br>diffuse                | Surrounding<br>Encased | Vesicles/<br>ER?                               | Vesicles<br>diffuse               | Surrounding + |
| Rab C1          | Periphery<br>Vesicles<br>discrete | Periphery<br>Vesicles<br>discrete   | Surrounding<br>Encased |                                                |                                   |               |
| Rab F2b<br>ARA7 | Vesicles<br>discrete              | Periphery<br>diffuse                | Surrounding<br>Encased |                                                |                                   |               |
| Rab F2a<br>Rha1 |                                   |                                     |                        | Vesicles<br>diffuse                            | Vesicles<br>diffuse               | Surrounding + |
| Rab F1<br>ARA6  | Periphery<br>Vesicles<br>discrete | Periphery<br>Vesicles +<br>discrete | Surrounding<br>Encased |                                                |                                   |               |
| FYVE            | Periphery<br>Vesicles<br>discrete | Periphery<br>Vesicles -<br>discrete | Surrounding<br>Encased | Periphery<br>Tonoplast<br>Vesicles<br>discrete | Tonoplast<br>Vesicles<br>discrete | Surrounding   |
| Rab G3f         | Periphery<br>discrete             | Periphery<br>discrete               | Surrounding<br>Encased |                                                |                                   |               |
| Rab G3c         | Periphery<br>diffuse              | Periphery<br>diffuse                | Surrounding<br>Encased | Tonoplast<br>discrete                          | Tonoplast<br>Vesicles<br>discrete | Surrounding + |
| VAMP711         | Periphery<br>discrete             | Periphery<br>discrete               | Surrounding<br>Encased |                                                |                                   |               |

## Supplementary Figures

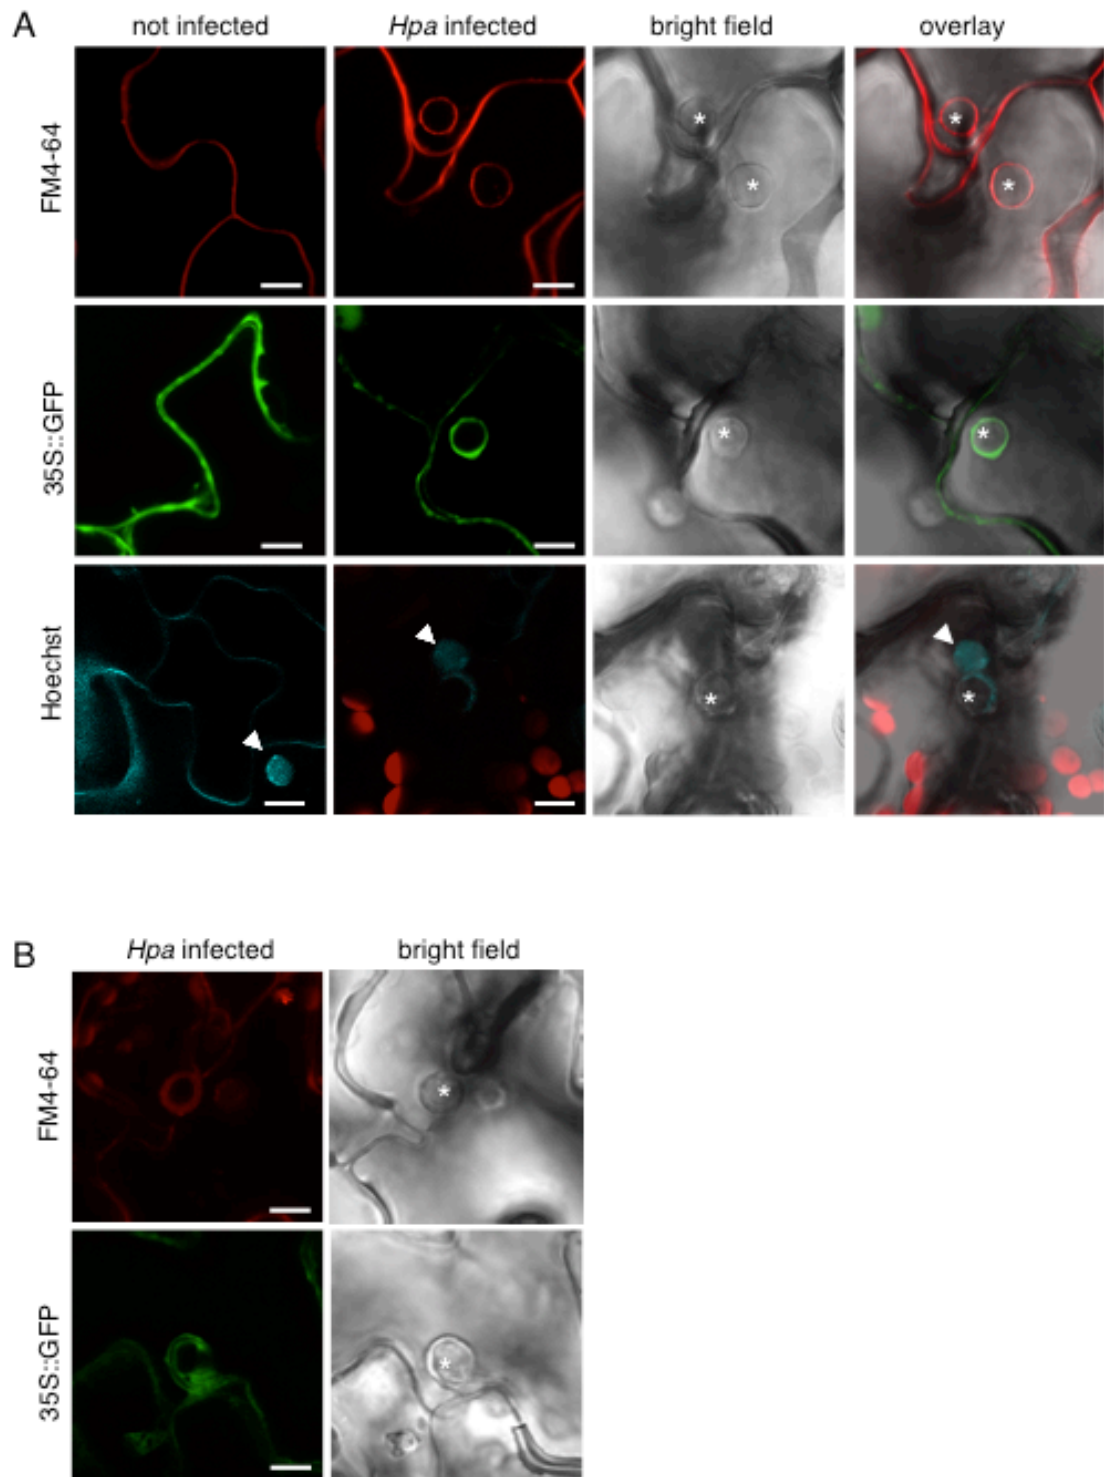

**Supplementary Figure 1.** Imaging *Hpa* haustoria. Arabidopsis Col-0 wild type and 35S::GFP transgenic lines were infected with *Hpa* isolate Waco and haustoria were imaged by confocal microscopy. At 3 dpi wild type leaves were incubated with the membrane dye FM4-64, or nuclear stain Hoechst, respectively. Confocal micrographs show cross-sections of not infected and *Hpa* infected leaves. *Hpa* haustoria are shown

in bright field images indicated by asterisks. (A) Membrane FM4-64 and cytosolic 35S::GFP signals are visible at the host cell periphery and around young haustoria. The Hoechst signal is visible in the nucleus in close proximity to the haustorium. (B) FM4-64 membrane and 35S::GFP cytosol labelling shows the double-layered structure of encasements of old *Hpa* haustoria. Bar = 10  $\mu\text{m}$ .

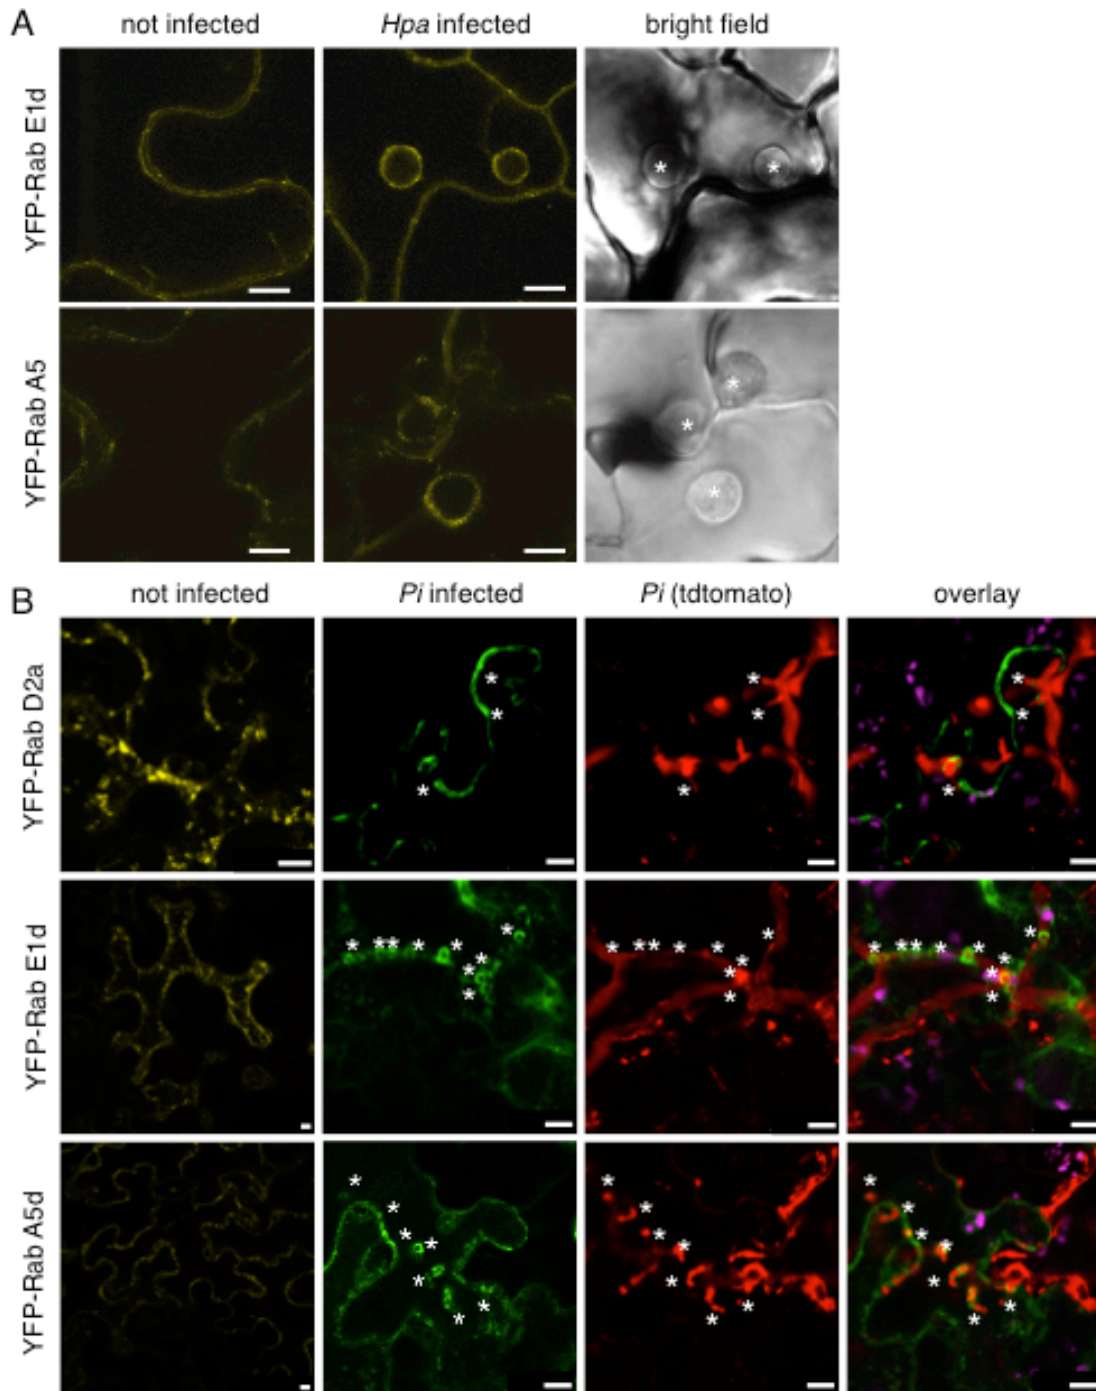

**Supplementary Figure 2.** Secretory vesicles differentially localize around *Hpa* and *Pi* haustoria. (A) Confocal micrographs of Arabidopsis transgenic lines expressing the indicated fluorophore fusions show cross-sections of not infected and *Hpa*-infected leaves at 3 dpi. *Hpa* haustoria are shown in bright field images indicated by asterisks. YFP-Rab E1d and YFP-Rab A5d signals are detected around *Hpa* haustoria. Bar = 10  $\mu$ m. (B) Confocal micrographs of *N. benthamiana* leaves transiently expressing the indicated fluorophore fusions show cross-sections of not infected and *Pi*-infected

leaves at 3 dpi. *Pi* haustoria are indicated by asterisks. YFP-Rab D2a, YFP-Rab E1d and YFP-Rab A5d are surrounding *Pi* haustoria. Bar = 10  $\mu$ m.

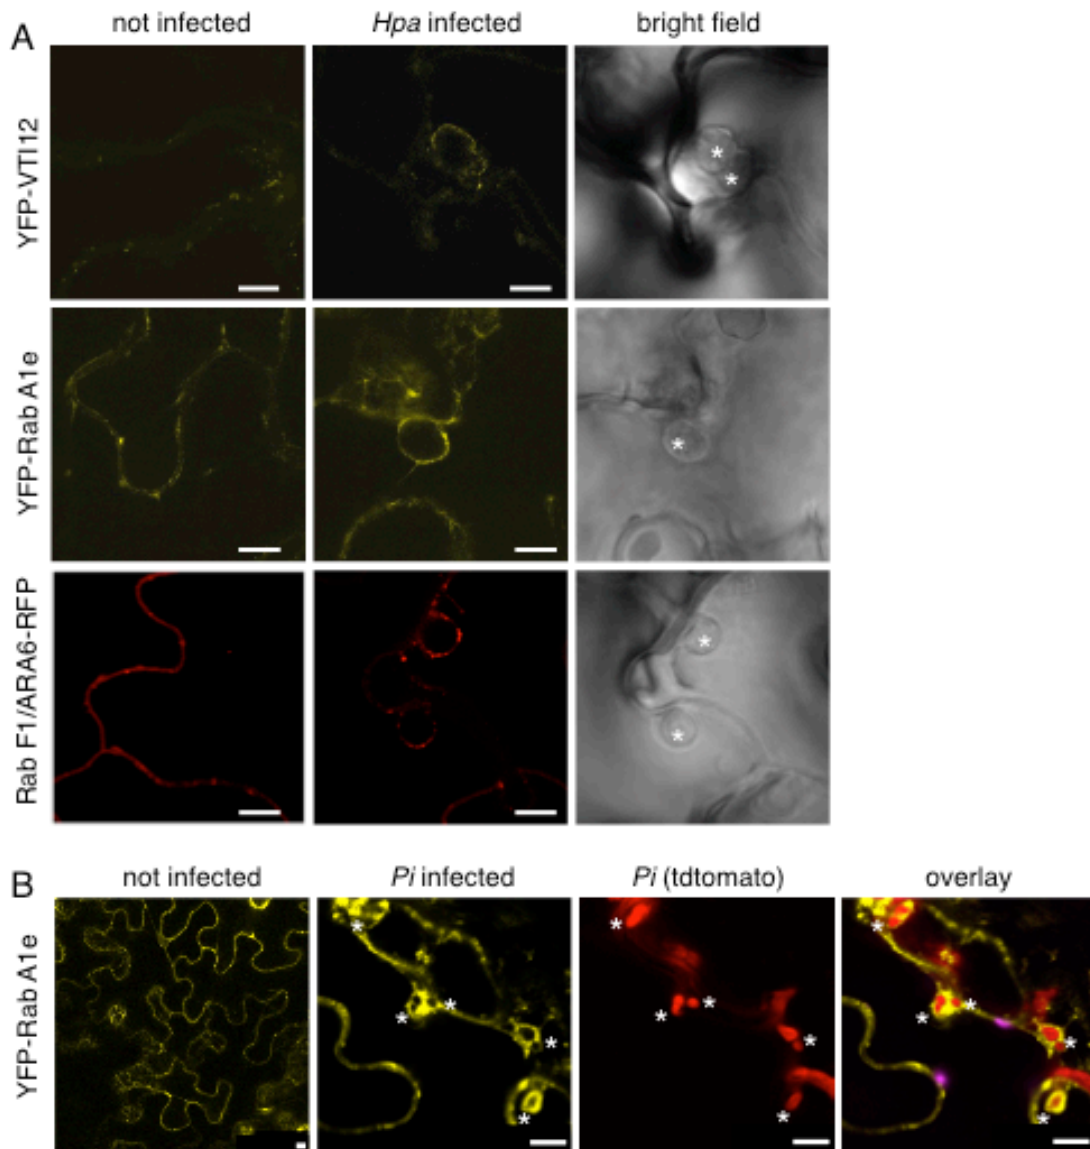

**Supplementary Figure 3.** Endosomal compartments differentially localize around *Hpa* and *Pi* haustoria. (A) Confocal micrographs of Arabidopsis transgenic lines expressing the indicated fluorophore fusions show cross-sections of not infected and *Hpa*-infected leaves at 3 dpi. *Hpa* haustoria are shown in bright field images indicated by asterisks. YFP-VTI12, YFP-Rab A1e, and ARA6-RFP signals are present at *Hpa* haustoria. Bar = 10  $\mu$ m. (B) Confocal micrographs of *N. benthamiana* leaves transiently expressing the indicated fluorophore fusions show cross-sections of not infected and *Pi*-infected leaves at 3 dpi. *Pi* haustoria are indicated by asterisks. While YFP-VTI12 does not surround haustoria, YFP-Rab A1e accumulates around *Pi* haustoria. Bar = 10  $\mu$ m.



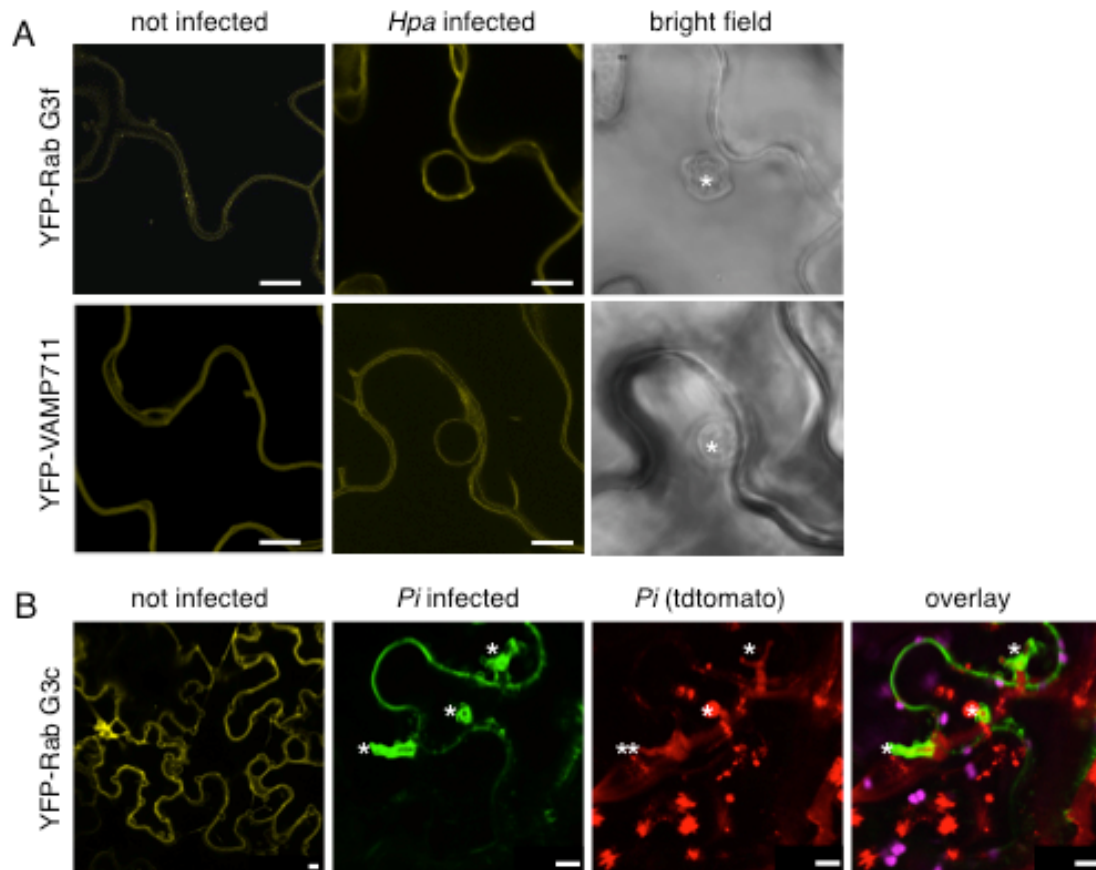

**Supplementary Figure 4.** Proteins labelling the vacuolar tonoplast localize around *Hpa* and *Pi* haustoria. (A) Confocal micrographs show cross-sections of Arabidopsis transgenic leaves expressing the indicated fluorescent-tagged proteins not infected and *Hpa*-infected at 3 dpi. *Hpa* haustoria are shown in bright field images indicated by asterisks. YFP-Rab G3f and YFP-VAMP711 signals are surrounding *Hpa* haustoria. Bar = 10  $\mu$ m. (B) Confocal micrographs of *N. benthamiana* leaves transiently expressing the indicated fluorophore fusions show cross-sections of not infected and *Pi*-infected leaves at 3 dpi. *Pi* haustoria are indicated by asterisks. YFP-Rab G3c accumulates around *Pi* haustoria. Bar = 10  $\mu$ m.

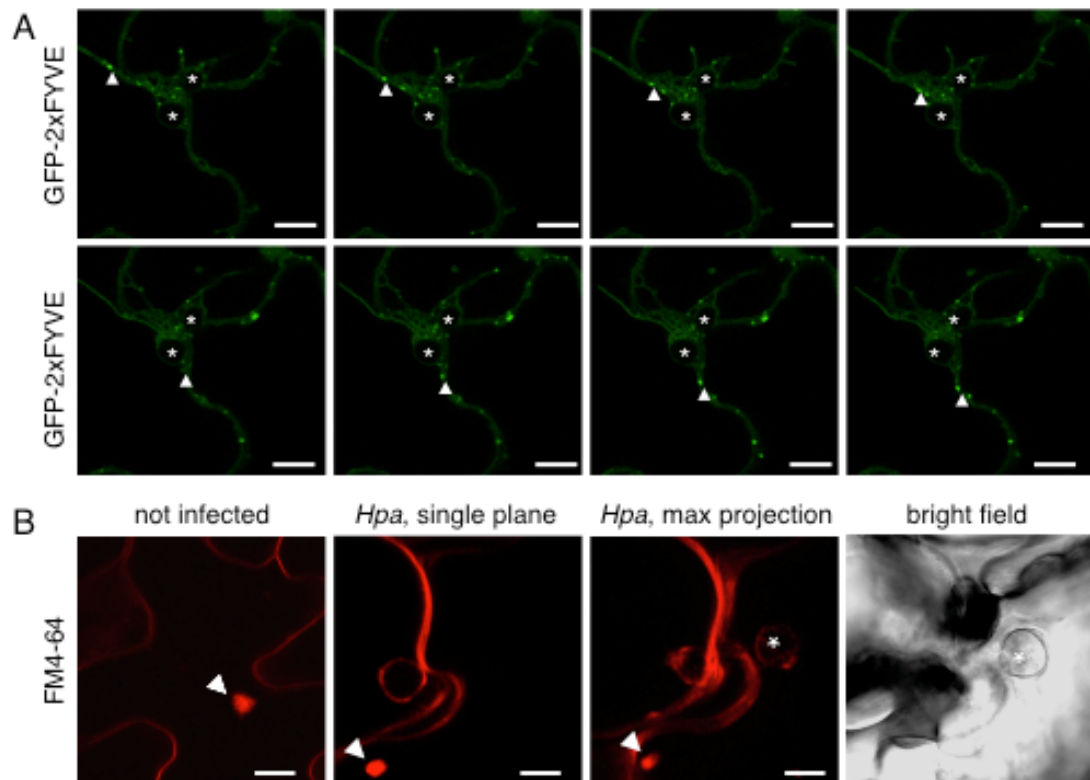

**Supplementary Figure 5.** *Hpa* haustoria-containing cells maintain endosomal trafficking. (A) Arabidopsis *Ler* transgenic lines expressing GFP-2xFYVE as a marker for late endosomal compartments were infected with *Hpa* isolate Cala 2 and haustoria were imaged at 3 dpi. Time-lapse imaging by confocal microscopy shows cross-sections of *Hpa* infected leaves over 815 ms. *Hpa* haustoria are indicated by asterisks. The GFP-2xFYVE signal is visible at the host cell periphery, some emerging plasma membrane strands and at the EHM of *Hpa* haustoria. The arrows indicate vesicle movement towards the haustorial site (upper panel) and away from the haustorium (lower panel). Bar = 10  $\mu$ M. (B) Arabidopsis Col-0 plants were infected with *Hpa* isolate Waco 9, and at 3 dpi leaves were treated with BFA and stained with FM4-64. Confocal micrographs show cross-sections of not infected and *Hpa*-infected leaves. *Hpa* haustoria are shown in bright field images indicated by asterisks. The FM4-64 signal is visible at the plant cell plasma membrane, at BFA bodies indicated by arrows, and at the *Hpa* EHM. The BFA body is detected in a different focal plane of the haustoria-containing cell shown by single plane and maximal projection. Bar = 10  $\mu$ m.

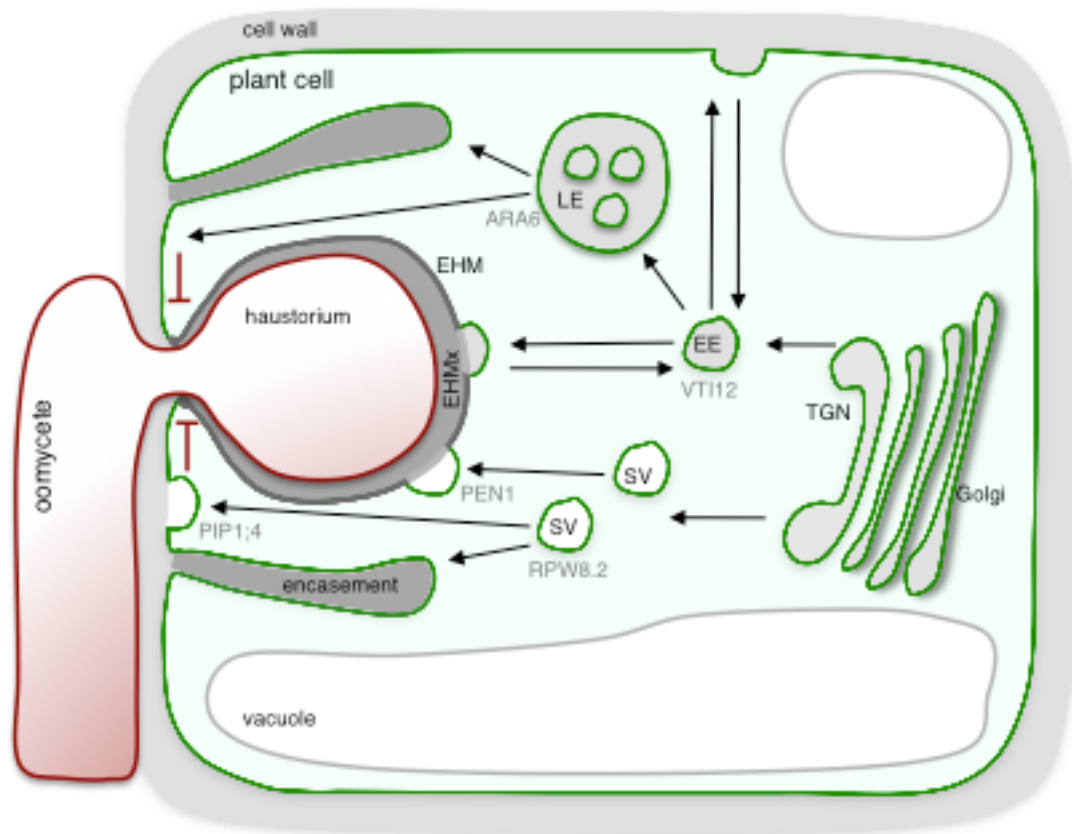

**Supplementary Figure 6.** Schematic representation of membrane trafficking in oomycete infected plant cells. Secretory vesicles deliver proteins such as PIP1;4 to the plasma membrane, but their lateral diffusion and incorporation into the extrahaustorial membrane must be prevented by the pathogen (EHM; red lines). Secretory vesicles may also deliver proteins like PEN1 to the EHM. Early endosomes (EE) may interact with the EHM and regulate presence of proteins at the EHM via recycling trafficking. Late endosomes (LE)/multivesicular bodies may contribute to enveloping the haustorium but proteins are sorted at the haustorial neck. As a result of recruitment of default membrane trafficking pathways, secretory vesicles, early and late endosomes contribute in the biogenesis of the encasement. TGN: *trans*-Golgi network; EHMx: extrahaustorial matrix; black arrows: proposed membrane trafficking pathways; molecular markers are highlighted in grey.

### Supplementary References

- Frei dit Frey, N., Mbengue, M., Kwaaitaal, M., Nitsch, L., Altenbach, D., Häweker, H., Lozano-Duran, R., Njo, M.F., Beeckman, T., Hüttel, B., Borst, J.W., Panstruga, R., Robatzek, S. (2011) A plasma membrane calcium ATPase functions in FLS2-mediated immunity. Submitted.
- Geldner, N., Dénervaud-Tendon, V., Hyman, D.L., Mayer, U., Stierhof, Y.D., and Chory, J. (2009) Rapid, combinatorial analysis of membrane compartments in intact plants with a multicolor marker set. *Plant J* **59**: 169-178.
- Göhre, V., Spallek, T., Häweker, H., Mersmann, S., Mentzel, T., Boller, T., *et al.* (2008) Plant pattern-recognition receptor FLS2 is directed for degradation by the bacterial ubiquitin ligase AvrPtoB. *Curr Biol* **18**: 1824-1832.
- Häweker, H., Rips, S., Koiwa, H., Salomon, S., Saijo, Y., Chinchilla, D., *et al.* (2010) Pattern recognition receptors require N-glycosylation to mediate plant immunity. *J Biol Chem* **285**: 4629-4636.
- Lefebvre, B., Timmers, T., Mbengue, M., Moreau, S., Hervé, C., Tóth, K., *et al.* (2010) A remorin protein interacts with symbiotic receptors and regulates bacterial infection. *Proc Natl Acad Sci USA* **107**: 2343-2348.
- Lipka, V., Dittgen, J., Bednarek, P., Bhat, R., Wiermer, M., Stein, M. *et al.* (2005) Pre- and postinvasion defenses both contribute to nonhost resistance in Arabidopsis. *Science* **310**: 1180-1183.
- Meyer, D., Pajonk, S., Micali, C., O'Connell, R., Schulze-Lefert, P. (2009) Extracellular transport and integration of plant secretory proteins into pathogen-induced cell wall compartments. *Plant J* **57**: 986-999.
- Schapiro, A.L., Voigt, B., Jasik, J., Rosado, A., Lopez-Cobollo, R., Menzel, D., *et al.* (2008) Arabidopsis synaptotagmin 1 is required for the maintenance of plasma membrane integrity and cell viability. *Plant Cell* **20**: 3374-3388.
- Vermeer, J.E., van Leeuwen, W., Tobeña-Santamaria, R., Laxalt, A.M., Jones, D.R., Divecha, N., *et al.* (2006) Visualization of PtdIns3P dynamics in living plant cells. *Plant J* **47**: 687-700.
- Wang, W., Wen, Y., Berkey, R., and Xiao, S. (2009) Specific targeting of the Arabidopsis resistance protein RPW8.2 to the interfacial membrane encasing the fungal Haustorium renders broad-spectrum resistance to powdery mildew. *Plant Cell* **21**: 2898-2913.
